# Supplementary material
Source: PubMed Central journal article supplement (PMC6103535)
Supplement: NIHMS964244-supplement-Supplemental_Questions.pdf [file NIHMS964244-supplement-Supplemental_Questions.pdf]

**Examples of Physician Partnership Building**

“And you want to describe any more of them [your pains]?”

“[I]f you want me to talk to them I can absolutely talk to them”

“Do you have any questions about the pain medicines we discussed?”

“[I]f you have a question when you leave, please call. I’ll be happy to answer back.”

**Examples of Patient Expression of Concern**

“I hear that’s pretty painful”

“[W]hen your interns come in and they go over my history it’s really...scary.”

**Example of Partnership Building Soliciting Assertive Response**

**Physician Partnership Building**

“How are you feeling now?”

**Patient Assertive Response**

“I don’t have the mobility I would like to have. I want to do things, but I’m limited.”

**Example of Partnership Building Soliciting Expression of Concern**

**Physician Partnership Building**

“Is there anything else you would like to discuss today?”

**Patient Expression of Concern**

“I miss physical activity [because of my discomfort from the treatment]. I miss doing things.”
